# Supplementary material for: Inhibition of Monocarboxylate Transporter 2 Induces Senescence-Associated Mitochondrial Dysfunction and Suppresses Progression of Colorectal Malignancies In Vivo
Source: Oxford University Press journal article supplement (doi:10.1158/1535-7163.mct-12-0488), 2012-09-11
Supplement: 15357163mct120488-sup-figleg.pdf [file 15357163mct120488-sup-figleg.pdf]

## Supplementary Figure Legends

Supplementary Figure 1. Effect of MCT1 knockdown on the growth of colon cancer cells. *A.* Effect of siMCT1 on the induction of senescence during colorectal cancer cell growth. The number indicates the percentage of SA- $\beta$ -Gal-positive cells. Colon cancer cells were transfected with indicated concentrations of siRNA, cultured for 5 days, and stained for SA- $\beta$ -Gal. *B.* Differential effects of siMCT1 vs siMCT2 on the growth of LoVo cells. LoVo cells were transfected with indicated concentrations of siRNA and cultured for 5 days.

Supplementary Figure 2. siMCT1 concentration-dependent increase in ROS accumulation. ROS levels were analyzed using the fluorescent dye DCF-DA, 5 days after transfection with siRNA.

Supplementary Figure 3. Fluorescence of LoVo cells observed using flow cytometry after staining with MitoTracker Red, 5 days after transfection with siRNA (20 nM).
